# Supplementary material
Source: PubMed Central journal article supplement (PMC4278684)
Supplement: nn505047n_si_001.pdf [file nn505047n_si_001.pdf]

## **Supporting information**

# Bioinspired Nanocomplex for Spatiotemporal Imaging of Sequential mRNA Expression In Differentiating Neural Stem Cells

Zhe Wang, Ruili Zhang, Zhongliang Wang<sup>\*</sup>, He-Fang Wang, Yu Wang, Jun Zhao, Fu Wang, Weitao Li, Gang Niu, Dale O. Kieseewetter, Xiaoyuan Chen<sup>\*</sup>

## Supplementary experimental methods:

### Texture feature analysis of gene expression heterogeneity obtained from dynamic imaging.

The spatial heterogeneity of the images was analyzed using co-occurrence matrix based on conditional probability density function  $P(i, j; a, d)$ . The value of  $i$ th,  $j$ th element in the co-occurrence matrix is the probability that intensity levels  $i$  and  $j$  occur in two voxels by distance ( $d$ ) and direction ( $a$ ) in the images. Here we defined  $d$  as one pixel size and used 26-connection in 3D space. The intensity level of  $i$  and  $j$  is 16 and the pixels of images are  $512 \times 512$ . The  $P(i, j; a, d)$  was calculated using reference [\*]. Co-occurrence feature of local homogeneity (LH) was deduced by [\*\*].

\*R. Haralick et al. Texture features for image classification, IEEE Trans. Syst. Man Cybern. S MC 3 ( 1973) 610 – 621

\*\*I. El Naqa et al. / Pattern Recognition 4 2 (2009) 1162 – 1171

#### Program Code:

```
%-- read the 3D image to 3D matrix

Aimage=zeros(512,512,71);

for i=1:71

    if(i<10) %i=1,2,3...,9

        image_name=['day 8-1 z stack_Z00' num2str(i) '.jpg'];

    else

        image_name=['day 8-1 z stack_Z0' num2str(i) '.jpg'];

    end

    image_tmp=imread(image_name);

    image_gray=rgb2gray(image_tmp);

    Aimage(:,:,i)=im2double(image_gray(1:2:1024, 1:2:1024));

end

%-- load the 3D image to 3D matrix
```

```

Y=Aimage;

clear Aimage

Ymin=min(min(min(Y)));

Ymax=max(max(max(Y)));

X1_16=(floor((Y-Ymin)*15./(Ymax-Ymin)+1.5));

%-- read the 3D image to 3D matrix

Pall=zeros(16,16);

for i=2:511

    for j=2:511

        for k=2:70

            %--- top layer 9 pixels

            Pall(X1_16(i,j,k),X1_16(i-1,j-1,k+1))=Pall(X1_16(i,j,k),X1_16(i-1,j-1,k+1))+1;

            Pall(X1_16(i,j,k),X1_16(i-1,j,k+1))=Pall(X1_16(i,j,k),X1_16(i-1,j,k+1))+1;

            Pall(X1_16(i,j,k),X1_16(i-1,j+1,k+1))=Pall(X1_16(i,j,k),X1_16(i-1,j+1,k+1))+1;

            Pall(X1_16(i,j,k),X1_16(i,j-1,k+1))=Pall(X1_16(i,j,k),X1_16(i,j-1,k+1))+1;

            Pall(X1_16(i,j,k),X1_16(i,j,k+1))=Pall(X1_16(i,j,k),X1_16(i,j,k+1))+1;

            Pall(X1_16(i,j,k),X1_16(i,j+1,k+1))=Pall(X1_16(i,j,k),X1_16(i,j+1,k+1))+1;

            Pall(X1_16(i,j,k),X1_16(i+1,j-1,k+1))=Pall(X1_16(i,j,k),X1_16(i+1,j-1,k+1))+1;

            Pall(X1_16(i,j,k),X1_16(i+1,j,k+1))=Pall(X1_16(i,j,k),X1_16(i+1,j,k+1))+1;

            Pall(X1_16(i,j,k),X1_16(i+1,j+1,k+1))=Pall(X1_16(i,j,k),X1_16(i+1,j+1,k+1))+1;

            %---

            %--- middle 8 pixels

```

```

Pall(X1_16(i,j,k),X1_16(i-1,j-1,k))=Pall(X1_16(i,j,k),X1_16(i-1,j-1,k))+1;
Pall(X1_16(i,j,k),X1_16(i-1,j,k))=Pall(X1_16(i,j,k),X1_16(i-1,j,k))+1;
Pall(X1_16(i,j,k),X1_16(i-1,j+1,k))=Pall(X1_16(i,j,k),X1_16(i-1,j+1,k))+1;
Pall(X1_16(i,j,k),X1_16(i,j-1,k))=Pall(X1_16(i,j,k),X1_16(i,j-1,k))+1;
Pall(X1_16(i,j,k),X1_16(i,j+1,k))=Pall(X1_16(i,j,k),X1_16(i,j+1,k))+1;
Pall(X1_16(i,j,k),X1_16(i+1,j-1,k))=Pall(X1_16(i,j,k),X1_16(i+1,j-1,k))+1;
Pall(X1_16(i,j,k),X1_16(i+1,j,k))=Pall(X1_16(i,j,k),X1_16(i+1,j,k))+1;
Pall(X1_16(i,j,k),X1_16(i+1,j+1,k))=Pall(X1_16(i,j,k),X1_16(i+1,j+1,k))+1;

%---

%--- bottom layer 9 pixels

Pall(X1_16(i,j,k),X1_16(i-1,j-1,k-1))=Pall(X1_16(i,j,k),X1_16(i-1,j-1,k-1))+1;
Pall(X1_16(i,j,k),X1_16(i-1,j,k-1))=Pall(X1_16(i,j,k),X1_16(i-1,j,k-1))+1;
Pall(X1_16(i,j,k),X1_16(i-1,j+1,k-1))=Pall(X1_16(i,j,k),X1_16(i-1,j+1,k-1))+1;
Pall(X1_16(i,j,k),X1_16(i,j-1,k-1))=Pall(X1_16(i,j,k),X1_16(i,j-1,k-1))+1;
Pall(X1_16(i,j,k),X1_16(i,j,k-1))=Pall(X1_16(i,j,k),X1_16(i,j,k-1))+1;
Pall(X1_16(i,j,k),X1_16(i,j+1,k-1))=Pall(X1_16(i,j,k),X1_16(i,j+1,k-1))+1;
Pall(X1_16(i,j,k),X1_16(i+1,j-1,k-1))=Pall(X1_16(i,j,k),X1_16(i+1,j-1,k-1))+1;
Pall(X1_16(i,j,k),X1_16(i+1,j,k-1))=Pall(X1_16(i,j,k),X1_16(i+1,j,k-1))+1;
Pall(X1_16(i,j,k),X1_16(i+1,j+1,k-1))=Pall(X1_16(i,j,k),X1_16(i+1,j+1,k-1))+1;

end

end

end

```

```

Pall=Pall./sum(sum(Pall));

figure;

surf(Pall);

axis([0,16, 0,16, 0,0.25]);

colorbar;

xlabel('i-level'); ylabel('j-level'); zlabel('Co-occurrence probability');

%--local homogeneity

PLH=0;

for i=1:16

    for j=1:16

        PLH=PLH+Pall(i,j)/(1+(i-j).^2);

    end

end

PLH

```

**Table S1. Gene sequences used in this study**

| <b>Names of DNA</b>                       | <b>Sequences</b>                                                           |
|-------------------------------------------|----------------------------------------------------------------------------|
| <i>Tubb3</i> recognizing sequence         | 5'-NH <sub>2</sub> -mUmCmC mAAG TCC ACC AGA ATmG mGmCmC AAA AAA-dithiol-3' |
| <i>Tubb3</i> Reporter                     | 5'-Alexa488-TGG CCA TTC TGG-3'                                             |
| <i>Tubb3</i> DNA target                   | 5'-GGC CAT TCT GGT GGA CTT GGA-3'                                          |
| <i>Tubb3</i> DNA target with one mismatch | 5'-GGC CAT TCT <b>GCT</b> GGA CTT GGA-3'                                   |
| <i>Fox3</i> recognizing sequence          | 5'-NH <sub>2</sub> -mCmAmU mUTT AAC AAG CGT TTmG mCmUmC AAA AAA-dithiol-3' |
| <i>Fox3</i> reporter                      | 5'-Cy3-TGA GCA AAC GCT-3'                                                  |
| <i>Fox3</i> DNA target                    | 5'-GAG CAA ACG CTT GTT AAA ATG-3'                                          |
| <i>Fox3</i> DNA target with one mismatch  | 5'-GAG CAA ACG <b>CAT</b> GTT AAA ATG-3'                                   |
| Survivin                                  | 5'-CAAGGAGCTGGAAGGCTG-3'                                                   |
| β-actin                                   | 5'-GCTACAGCTTCACCACCACAG-3'                                                |
| Nestin                                    | 5'-GTCTCAGGACAGTGCTGAGCCTTC-3'                                             |
| GAPDH                                     | 5'-GGTCTCCTCTGACTTCAACA-3'                                                 |
| CXCR4                                     | 5'-CGGCAGCAGGTAGCAAAGTGAC-3'                                               |

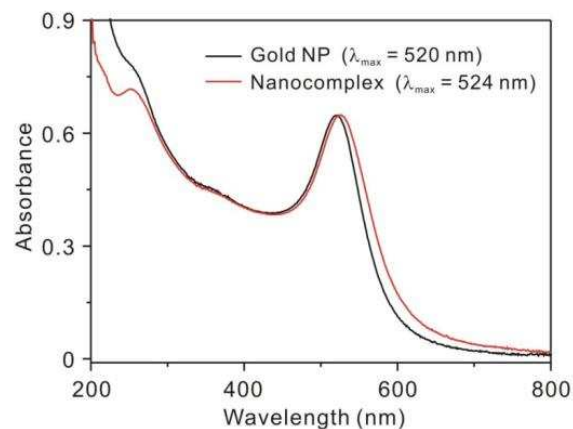

**Figure S1.** UV-Vis spectra of pure gold nanoparticles (black) and multifunctional nanocomplex (red).

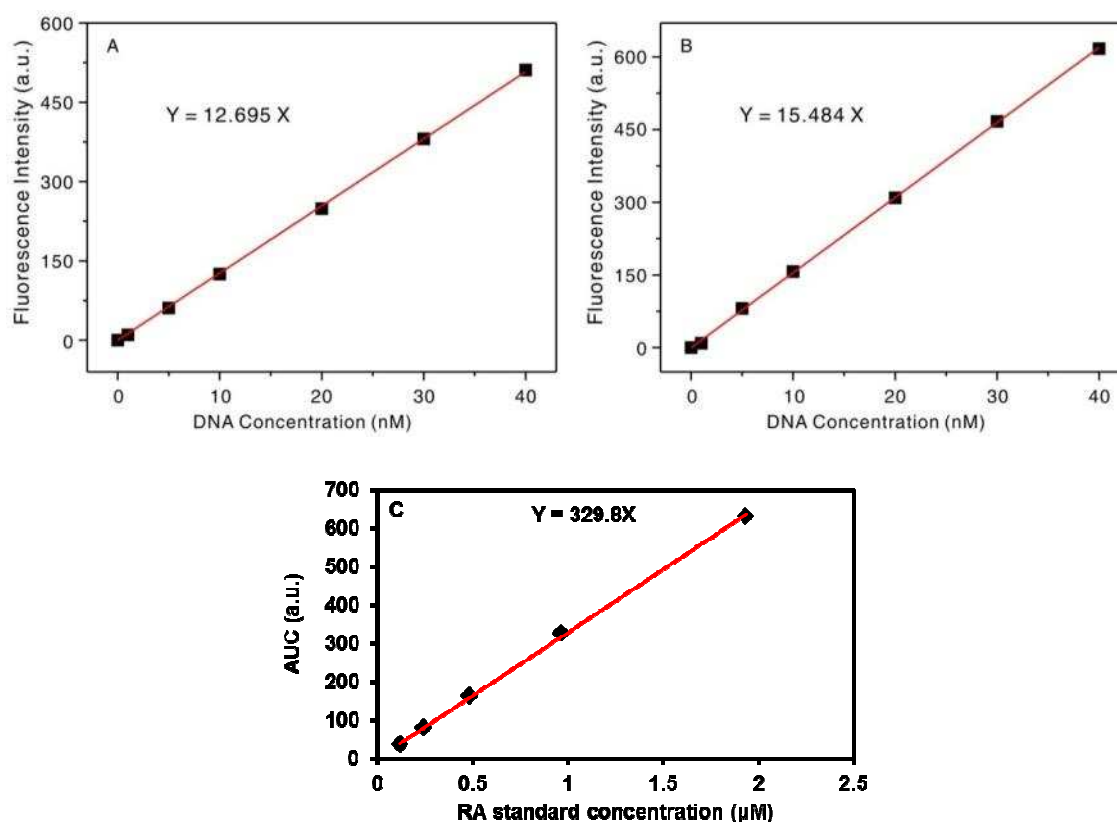

**Figure S2.** Calibration curves (A) Plot of fluorescence intensity as the function of DNA concentration of Alexa 488-modified *Tubb3* oligo. (B) Plot of fluorescence intensity as the function of DNA concentration of Alexa 488-modified *Tubb3* oligo of Cy3-modified *Fox3* oligo. (C) Calibration curve of area under curve values from HPLC analysis to retinoic acid standard concentration.

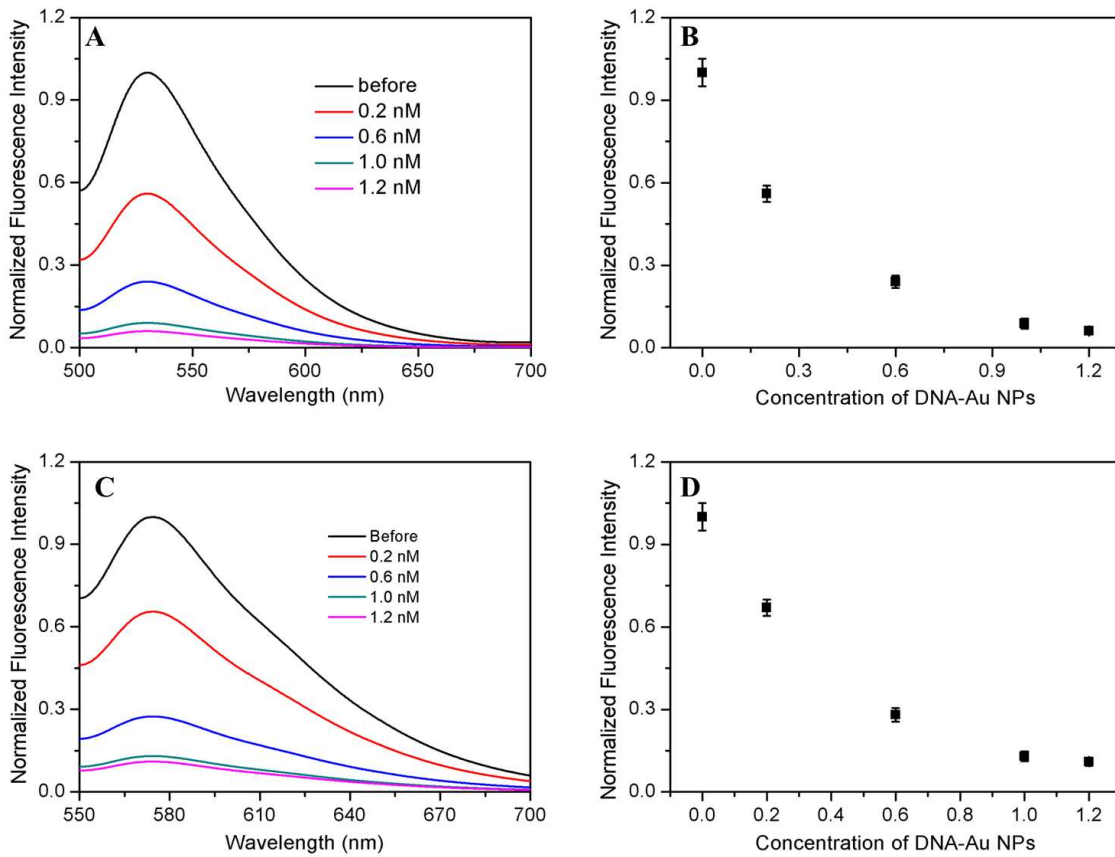

**Figure S3.** Quenching effects of AuNP to fluorophores. (A) Fluorescence spectrum of Alexa 488 linked oligo reporter (*Tubb3*) in hybridization with corresponding recognizing sequence modified AuNP. (B) The peak fluorescence (wavelength=520nm) decay of Alexa 488 caused by AuNP quenching effect. (C) Fluorescence spectrum of Cy3 linked oligo reporter (*Fox3*) in hybridization with corresponding recognizing sequence modified AuNP. (D) The peak fluorescence (wavelength=570nm) decay of Cy3 caused by AuNP quenching effect. (n=3)



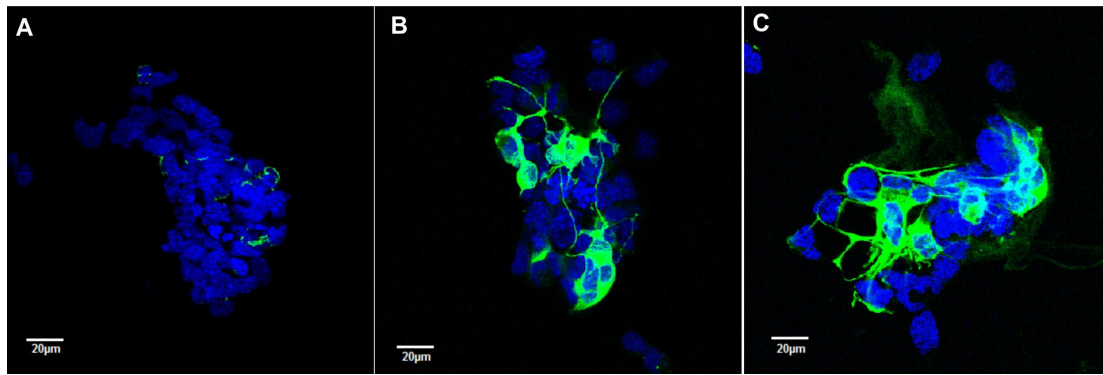

**Figure S4.** Immunofluorescence staining of  $\beta$ III tubulin expression in differentiating neural stem cells at different treatment conditions over 8 days: (A) 15 nM RA dissolved in medium; (B) 1  $\mu$ M RA dissolved in medium; (C) 15 nM RA attached on fNC. Scale = 20  $\mu$ m. Blue: DAPI.

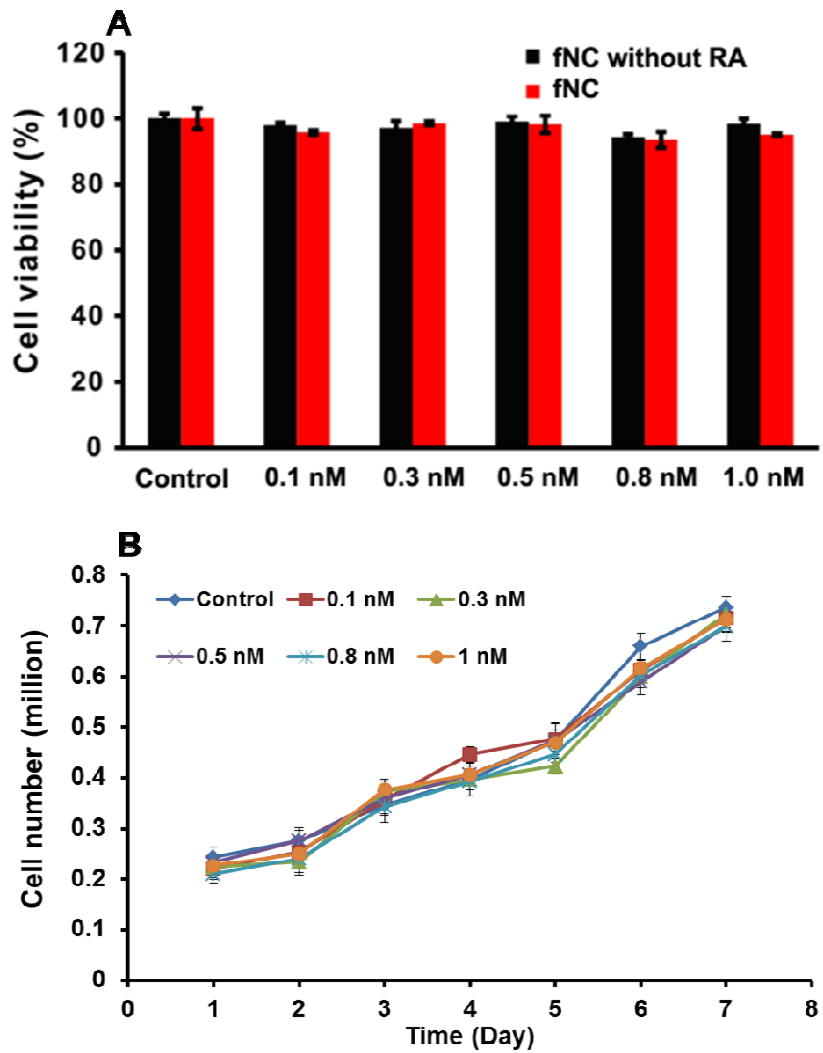

**Figure S5.** Cytotoxicity assays of fNC to neural stem cells. (A) MTT assay of fNC with and without RA from 0.1-1 nM after 48h incubation. (n=6) (B) Neural stem cell self-renewing rate in different concentrations of fNC without RA over 7 days. (n=3)

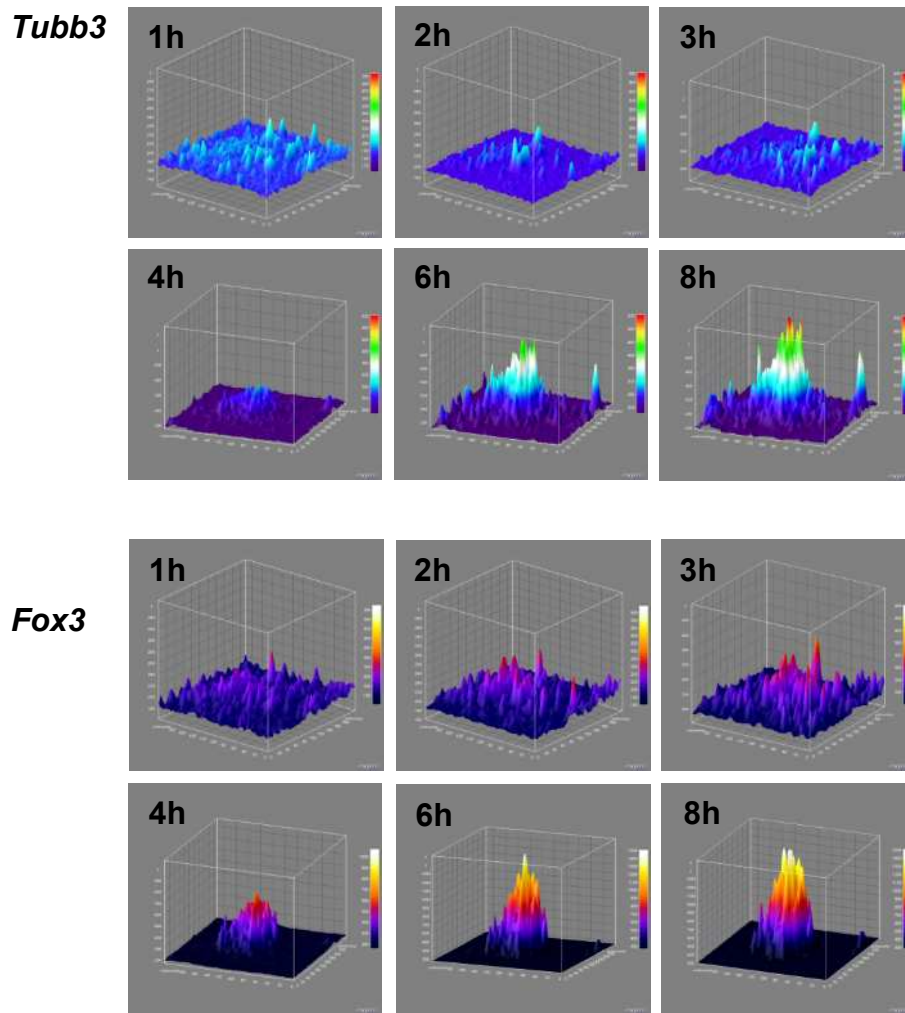

**Figure S6.** Hot map analysis of mRNA imaging results of differentiated NSCs at different time points on day 8. Top panel: *Tubb3*; bottom panel: *Fox3*.

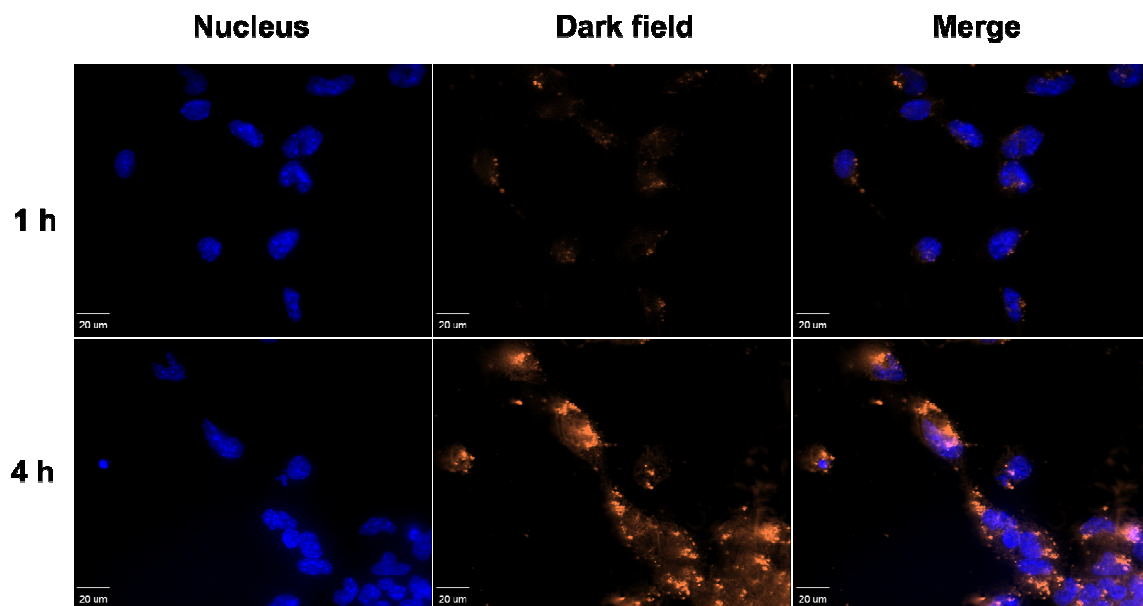

**Figure S7.** Dark field imaging of the cellular uptake of the nanocomplex after 1h and 4h incubation. Blue: Hoechst 33342. Scale bar = 20 μm

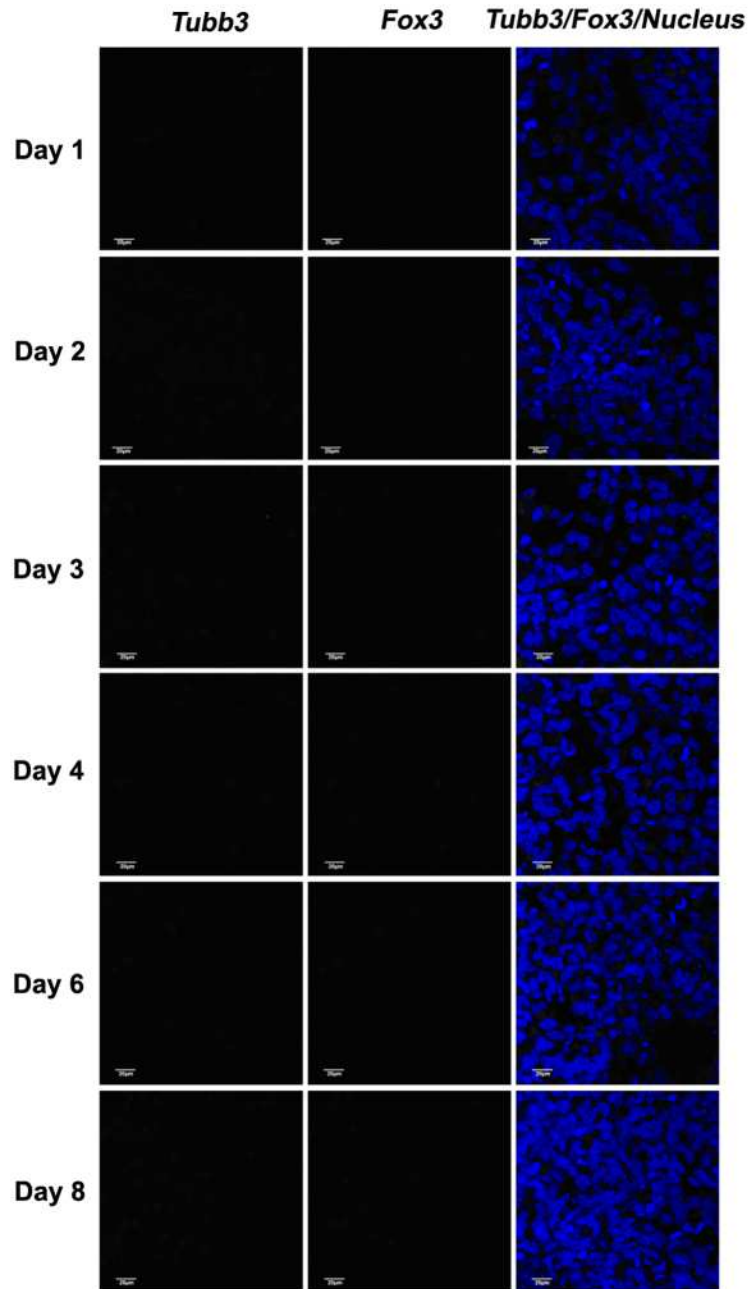

**Figure S8.** Negative control of fNC without RA motif for detection of *Tubb3* and *Fox3* mRNA expressions over 8 days. Scale = 20  $\mu$ m. Blue: Hoechst 33342. The morphology of original epithelial shape of NSCs was not changed and minimal background noise, if any, could be detected for both mRNAs after 4 day incubation onwards.

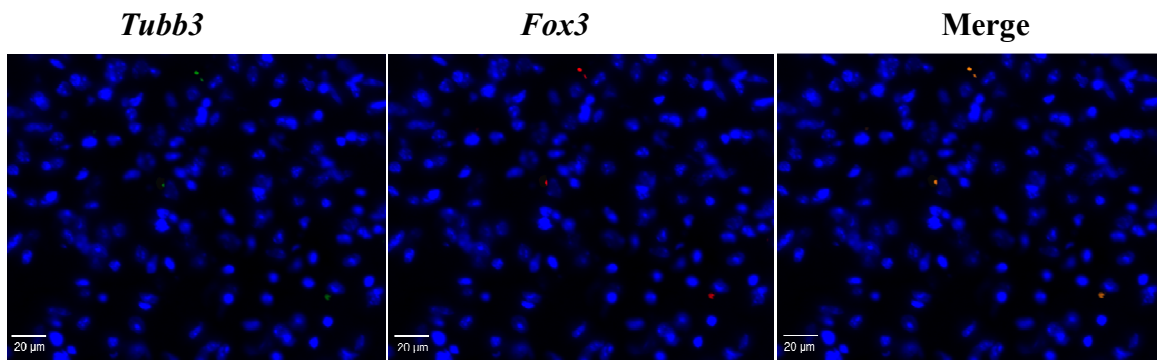

**Figure S9.** Fluorescence of brain tissues adjacent to lateral ventricle on day 8. Scale bar = 20 μm. Green: *Tubb3* mRNA imaging; Red: *Fox3* mRNA imaging; Yellow/orange: Merge.

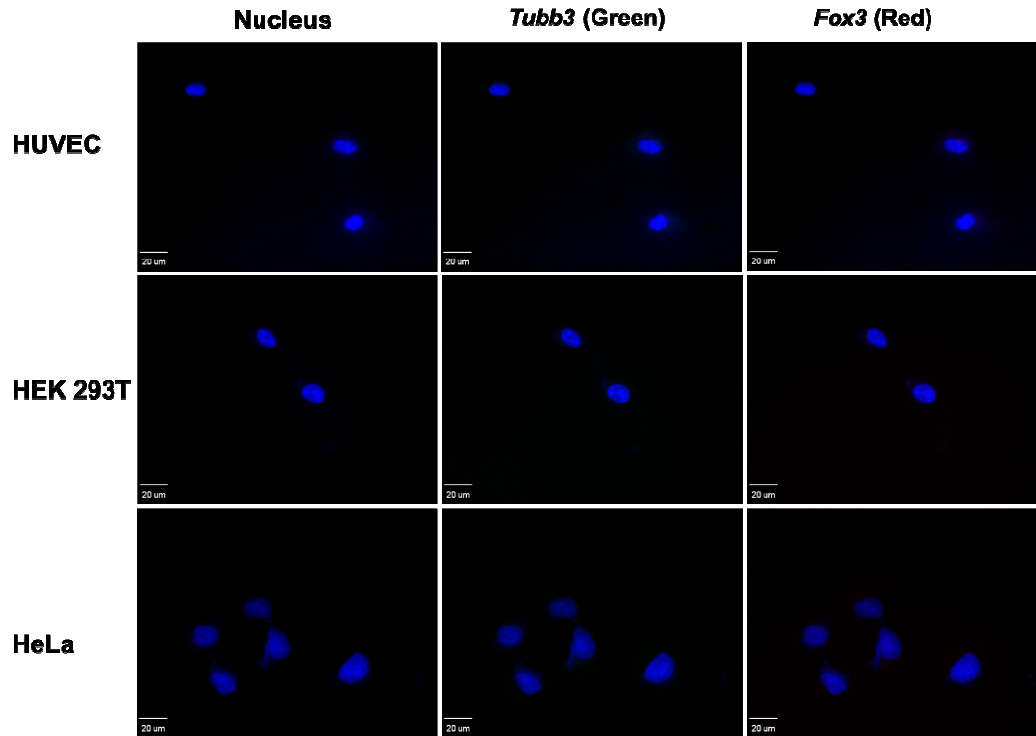

**Figure S10.** *In vitro* assay of off-target fluorescence of fNC in different cell types. Green: Alexa 488; Red: Cy3.
